# Supplementary material
Source: Springer Nature journal article supplement (https://www.springermedizin.de/resource/supplementary/12916_2011_464_MOESM2_ESM.pdf/9599742)

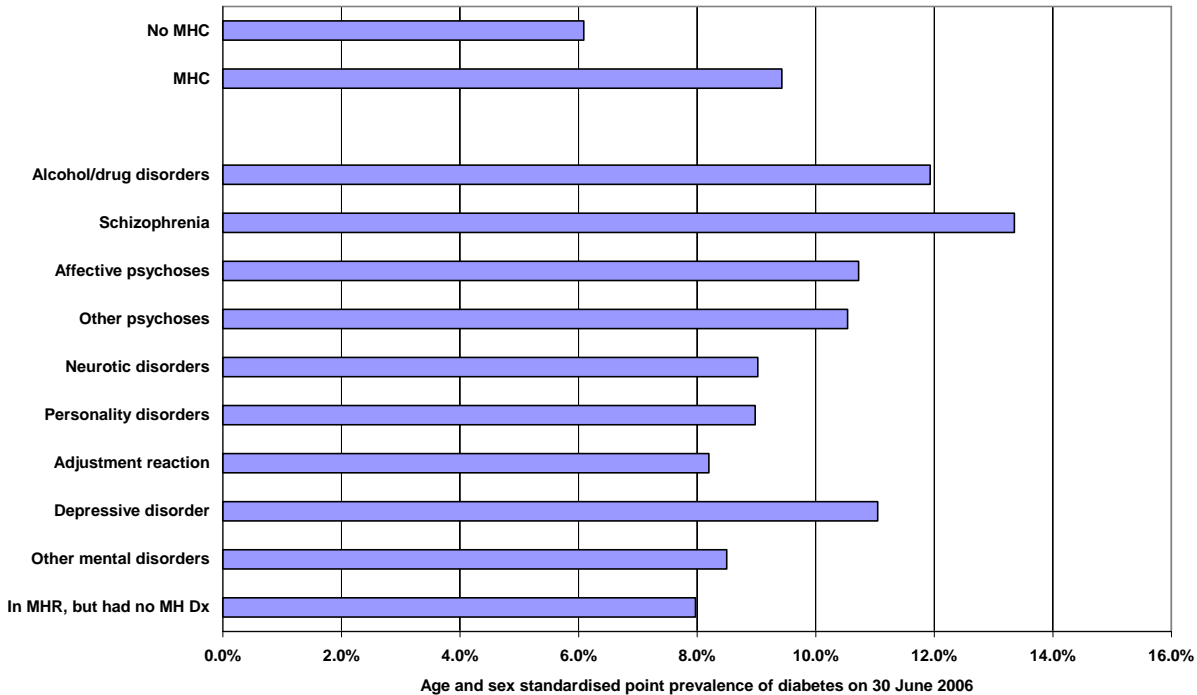

Supplement: MOESM2 [file 9599742]
